# Supplementary material for: Physical exercise prepartum to support metabolic adaptation in the transition period of dairy cattle: A proof of concept
Source: PubMed Central journal article supplement (PMC7217059; doi:10.1111/jpn.13330), 2020-02-25
Supplement: JPN-104-790-s001.pdf [file JPN-104-790-s001.pdf]

## SUPPORTING INFORMATION

### Physical exercise prepartum supports metabolic adaptation in the transition period of dairy cattle

R. M. A. Goselink, J. T. Schonewille, G. van Duinkerken, and W. H. Hendriks

**Table S1** Model characteristics and variance components of the random coefficient model analysis of each parameter by REML method.

|                                                               | Deviance<br>(df) | Variance components |       | Hetero-<br>geneity | Variance component |             |             |             |             |             |
|---------------------------------------------------------------|------------------|---------------------|-------|--------------------|--------------------|-------------|-------------|-------------|-------------|-------------|
|                                                               |                  | Cow                 | Time  |                    | Cow x Time         |             |             |             |             |             |
| <i>Liver TG</i>                                               |                  |                     |       |                    |                    |             |             |             |             |             |
| g/kg wet weight                                               | 249 (32)         | 120.7               | -     | None               | 256.2              |             |             |             |             |             |
| relative to wk-2                                              | 67 (32)          | -5.5                | 0.86  | None               | 7.39               |             |             |             |             |             |
|                                                               |                  |                     |       |                    |                    |             |             |             |             |             |
| <i>Prepartum</i>                                              |                  |                     |       |                    | <i>wk-6</i>        | <i>wk-5</i> | <i>wk-4</i> | <i>wk-3</i> | <i>wk-2</i> | <i>wk-1</i> |
| DMI (kg/d)                                                    | 230 (142)        | 0.74                | 0.22  | Outside            | 2.61               | 0.64        | 0.85        | 1.00        | 0.82        | 0.99        |
| NE <sub>L</sub> bal (kJ/kg <sup>0.75</sup> ·d <sup>-1</sup> ) | 1130 (118)       | 1576.4              | 0.26  | Outside            | 5030               | 978         | 1634        | 1498        | 1269        | 1413        |
| NEFA (mmol/L)                                                 | -67 (47)         | 0.045               | 0.34  | None               | 0.34               |             |             |             |             |             |
| BHB (mmol/L)                                                  | -62 (47)         | 0.038               | -0.85 | None               | 0.038              |             |             |             |             |             |
| Cholesterol (mmol/L)                                          | 18 (47)          | 0.27                | 0.41  | None               | 0.27               |             |             |             |             |             |
| HDL-chol (mmol/L)                                             | -38 (47)         | 0.069               | -0.07 | None               | 0.069              |             |             |             |             |             |
| LDL-chol (mmol/L)                                             | -47 (47)         | 0.080               | 0.56  | None               | 0.080              |             |             |             |             |             |
| VLDL-chol (mmol/L)                                            | -248 (47)        | 0.001               | 0.097 | None               | 0.001              |             |             |             |             |             |
|                                                               |                  |                     |       |                    |                    |             |             |             |             |             |
| <i>Postpartum</i>                                             |                  |                     |       |                    | <i>wk1</i>         | <i>wk2</i>  | <i>wk3</i>  | <i>wk4</i>  | <i>wk5</i>  | <i>wk6</i>  |
| DMI (kg/d)                                                    | 306 (146)        | 2.3                 | 0.63  | Outside            | 5.9                | 3.3         | 1.9         | 2.0         | 2.0         | 1.4         |
| Milk yield (kg/d)                                             | 415 (146)        | 32.8                | 0.56  | Outside            | 11.0               | 3.4         | 1.5         | 4.1         | 1.6         | 1.6         |
| FPCM (kg/d)                                                   | 446 (144)        | 19.1                | 0.81  | Outside            | 23.5               | 12.7        | 8.0         | 5.8         | 7.0         | 0.7         |
| Milk fat (g/kg)                                               | 584 (144)        | 10.3                | 0.39  | Outside            | 22.7               | 11.3        | 10.9        | 11.8        | 3.9         | 13.8        |
| Milk protein (g/kg)                                           | 362 (144)        | 9.3                 | 0.82  | Outside            | 13.6               | 4.8         | 3.3         | 1.7         | 13.9        | 1.0         |
| Milk lactose (g/kg)                                           | 131 (144)        | 0.97                | 0.37  | Outside            | 1.41               | 0.70        | 0.31        | 0.35        | 0.90        | 0.09        |

|                                                               |            |        |       |         |       |       |       |       |       |       |
|---------------------------------------------------------------|------------|--------|-------|---------|-------|-------|-------|-------|-------|-------|
| Fat yield (kg/d)                                              | -411 (144) | 0.043  | 0.80  | Outside | 0.072 | 0.050 | 0.032 | 0.022 | 0.030 | 0.000 |
| Protein yield (kg/d)                                          | -529 (144) | 0.027  | 0.83  | Outside | 0.035 | 0.017 | 0.012 | 0.005 | 0.031 | 0.004 |
| Lactose yield (kg/d)                                          | -491 (144) | 0.057  | 0.60  | Outside | 0.027 | 0.011 | 0.007 | 0.012 | 0.007 | 0.000 |
| NE <sub>L</sub> bal (kJ/kg <sup>0.75</sup> ·d <sup>-1</sup> ) | 1280 (121) | 12248  | 0.61  | Outside | 12545 | 8783  | 5343  | 7103  | 3550  | 240   |
| NEFA (mmol/L)                                                 | -236 (147) | 0.015  | 0.21  | None    | 0.050 |       |       |       |       |       |
| BHB (mmol/L)                                                  | -220 (142) | 0.008  | 0.35  | Outside | 0.040 | 0.300 | 0.065 | 0.110 | 0.013 | 0.048 |
| Cholesterol (mmol/L)                                          | -150 (142) | 0.20   | 0.69  | Outside | 0.086 | 0.053 | 0.055 | 0.116 | 0.180 | 0.718 |
| HDL-chol (mmol/L)                                             | -256 (142) | 0.072  | 0.75  | Outside | 0.002 | 0.035 | 0.050 | 0.098 | 0.154 | 0.237 |
| LDL-chol (mmol/L)                                             | -346 (142) | 0.021  | 0.58  | Outside | 0.024 | 0.007 | 0.012 | 0.026 | 0.053 | 0.207 |
| VLDL-chol (mmol/L)                                            | -913 (147) | 0.0001 | 0.076 | None    | 0.001 |       |       |       |       |       |

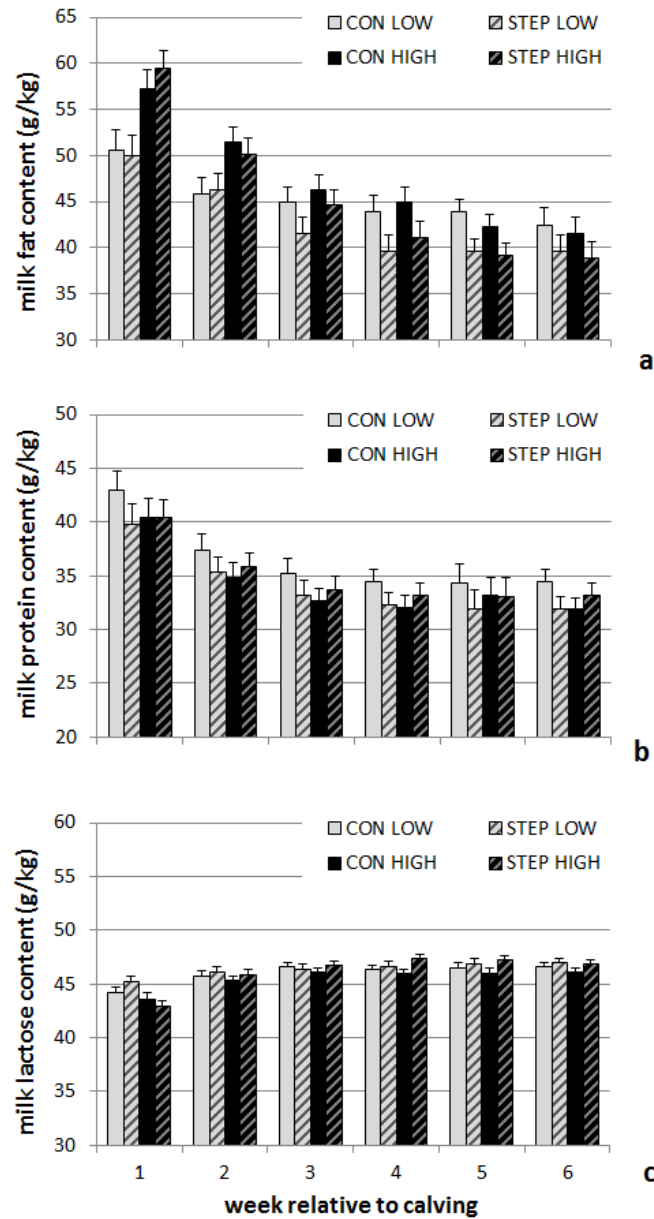

**Figure S1** Average milk content (g/kg) of a) fat; b) protein; and c) lactose for each treatment group during the experiment. Figures showing predicted means by REML analysis with SEM.

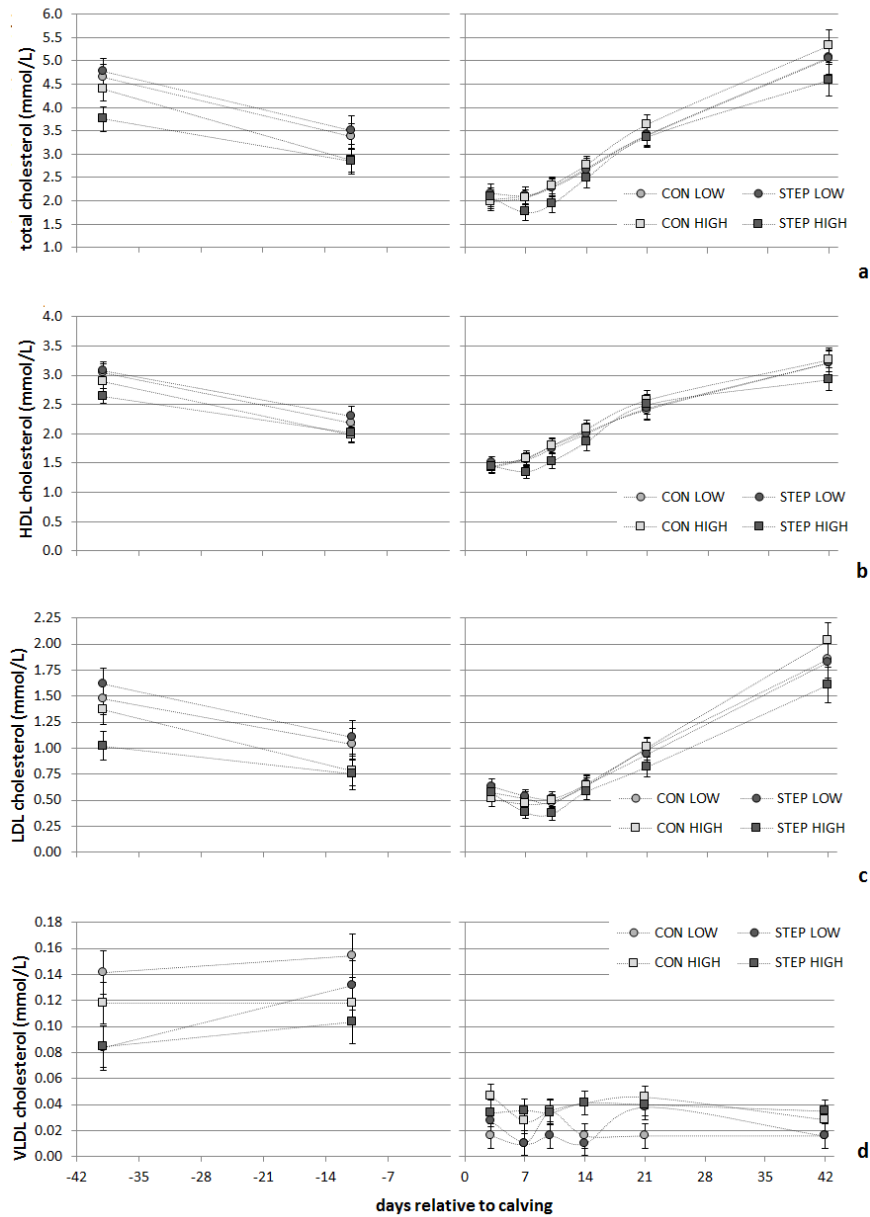

**Figure S2** Average plasma concentration (in mmol/L) of a) total cholesterol; b) HDL cholesterol; c) LDL cholesterol; and d) VLDL cholesterol. Figures showing predicted means by REML analysis with SEM.
